# Supplementary material
Source: PubMed Central journal article supplement (PMC7161894)
Supplement: BIES-38-1068-s001.pdf [file BIES-38-1068-s001.pdf]

## **NORMAL TCR CONTROL LIST (9 Patients, 114 TCR)**

### **Probert, et al., 1996 [15] patients)**

#### **Normal 1**

CASEGQRTEAFFG  
CASSQGLMTEAFFG  
CASSTREILTEAFFG  
CASSWIRGVGTEAFF  
CASSGTGTSVYGYTFG  
CASSDLEGGNEKLFFG  
CASSGTAAPQPQHFG  
CASSGNRVPQPQHFG  
CASSGGSSQGQPQHFG  
CASSGGGDQPQHFG  
CASSADRISPLHFG  
CASSGESQFFG  
CASSSSGGYIQFFG  
CASSTGQGGDQFFG  
CASSDRDRTTDTQYFG  
CASSGMAGGTDQYFG  
CASSALKRKDYEIGYFG  
CASSLGLAGVSYEQYFG

#### **Normal 2**

CSAEGRGTEAFFG  
CSASPWTQTEAFFG  
CASRPGFQPQHFG  
CSARGSAQPQHFG  
CSAIGQTVEQPQHFG  
CSASRWQGGNQPQHFG  
CSARRPGTGWVQGGQPQHFG  
CSATSGQFFG  
CSAEGGTDQFFG  
CSAYSSGASQFFG  
CSARDGRDGQFFG  
CFASTGSGSQFFG  
CSARGLETGELFFG  
CSAGAATDTQYFG  
CSASLANTDTQYFG  
CSAEVAGGTDQYFG  
CSAVLLLATTDTQYFG  
CSARWAGGPTDTQYFG  
CSATRGRETQYFG  
CSASGGDTSYEQYFG  
CSARDQGLADSYEQYFG

CSADPSRLGGVSYEQYFG  
CSARRTETRPWEDSYEQYFG

**Zeng W, et al. 2001 [16] (2 subjects)**

**Normal 1**

CASSSQGGVEKLFFG  
CASSLKGSNSPLHFG  
CAGRGTSTDTQYFG  
CASSFIGSYGQYFG  
CASSFSGAYEQYFG  
CASSLADGTYEYFG  
CASSKPRARETSGYNEQFFG  
CASSLGDRGQETQYFG  
CASSPPARGYTFG  
CASVPIRETQYFG  
CASSPPSGENQPQHFG  
CASVKTRQYNEQFFG  
CASSNEDGKELFFG  
CASAKFSNTEAFFG  
CASSLHQKRPWYTFG  
CASSWTGFGPETQYFG

**Normal 2**

CASSRTGKDYGYTFG  
CASSGGTRDNTEAFFG  
CASSCSHPRQKNIQYFG  
CASSLSRPGTDTQYFG  
CASSIRDTEQFFG  
CASSPGEWGEQFFG  
CASSPGDTGETQYFG  
CASSTRDSGGYTFG  
CASSRVPQHFG  
CASSPGEKDTQYFG  
CASSSQYTGELFFG  
CASSRDGYEQFFG  
CASSRFGDETQYFG

**Mamadov, et al., 2011 [17] (2 subjects)**

**Normal 1**

CASSVALGLNYEQYF  
CASSLSGGAGELFF  
CAIKTTSGIVDEQFF  
CASSLWEGREQFF

CSVGTSEAYEQYF  
CSARTTYGTDIISQHF  
CSVEIWDSSYNEQFF  
CASSLAPGATNEKLFF  
CASSLGENIQYF  
CASTVDSLDEAFF

**Normal 2**

CASSLSGGAGELFF  
CASSPGLAASYNEQFF  
CASSFKGADTQYF  
CASTVDSLDEAFF  
CASSTAGVHYNEQFF  
CASTSWAQASTDTQYF  
CASPHTGQSLPYGYTF  
CASSFYKSSEQYF  
CASSLDGYSPLHF  
CASSLHGELFF  
CASGSGLAGGELFF  
CASSLVEAGDPYEQYF  
CASSLAPGATNEKLFF  
CASSLAGGTAHTEAFF  
CASSLEASPTSQTQYF  
CASSSTGDFSSEQYF  
CASSPHYTDTQYF  
CASSVALGLNYEQYF  
CASSVETGDLAFETQYF  
CASSVGAADTQYF  
CASSGQLSNTGELFF

**Forman, at al., 1994 [14] (1 subjects)**

CASKLNYNIHEQFFG  
CASTVPGQGETEAFFG

**biomedimmunotech, 2016 [13] (2 subjects)**

CASSSYEQYFGPGTRL  
CASSPPGELLFEGSRL  
CASSPDALGYTFGSGTRL  
CASTTSGGYEQYFGPGTRL  
CASSAHAVPGELFFEGSRL  
CASSGASAGYEQYFGPGTRL  
CASTPHPGETEAFFGQGTRL  
CASSPTANVPGELFFEGSRL  
CASTTGRGSGTEAFFGQGTRL

CASTTGGHRAGTEAFFGQGTRL  
CASSGASAGYEQYFGPGTRL

**PATIENT CONTROL TCR LIST (18 Patients; 101 TcR)**

**Quiròs Roldan, et al 1994 [19] (Rheumatic Fever) 1 patient**

1-1 CASSGRQGRYEQY  
1-2 CASSFTGRILDNEQF  
1-3 CASSMRTPVSSI  
1-4 CASSDTPITGTASKLT  
1-5 CASSLGDTDKLI

**Diluvio, et al., 2006 [18] (Streptococcal Infection) 3 patients**

TONSIL 1-1 CASSSSGTGYQPQHF  
TONSIL 1-2 CASSRRDMNTGELFF  
TONSIL 2-1 CASSYSPGLGGRVDEQFF  
TONSIL 3-1 CASSSRDSLAVEKLFF  
TONSIL 3-2 CASEQGS LAGELFF  
TONSIL 3-3 CASSLGTGETDTQYF  
TONSIL 3-4 CASSLGGQVYEQYF

**Brawley and Concannon, 1999 [20] (Influenza H3N2) 1 patient**

INFLUENZA 1 CAVSEGGSYDKVIFGPG  
INFLUENZA 2 CAVSEDTSYEKLVFGKG  
INFLUENZA 3 CASSPGTSGTTYEQYFG

**Goulmy, et al, 1995 [21] (Influenza haemagglutinin) 1 patient**

TCR Inf HA 1: CASSLVANQPQHFGDG  
TCR Inf HA 3: CASSLVRTYEQYFGPG  
TCR Inf HA 4: CASSSTRLEKLFFGSG  
TCR Inf HA 5: CASRSTGGVALTEAFF

**Bowness, et al, 1993 [22] (Influenza NP) 1 patient**

TCR Inf NP 1: CASSQERVGETQYFG  
TCR Inf NP 2: CASSQEGVGEKLPFG  
TCR Inf NP 3: CASSQETVGEKLPFG

TCR Inf NP 4: CASSQELTGNTTYFG  
TCR Inf NP 5: CASSQEVLDTQYFG  
TCR Inf NP 6: CASSPDIVETQYPG  
TCR Inf NP 7: CASSQVSAGNTTYPG  
TCR Inf NP 8: CASSNPAHTQYPG

**Moss, et al, 1991 [23] (Influenza A) 1 patient**

TCR Inf 1: CASSIRSSYENYF  
TCR Inf 2: CASSTNTEAFFGQG  
TCR Inf 3: CASSVNPNEAFFGQG  
TCR Inf 4: CASSTHYLNEQFFGPG  
TCR Inf 5: CASSMRSQETQYFGPG  
TCR Inf 6: CASSIRSSYEQYFGPG  
TCR Inf 7: CASSIRSTGELFFGEG  
TCR Inf 8: CASSIRSTDTQYFGPG  
TCR Inf 9: CASSLLAADEQYFGPG

**Jacobsen, et al, 2007 [29] (Tuberculosis TCR) 1 patient**

TCR TB1: CASSAGPGVLTQFF  
TCR TB2: CASSGPNSPLHF  
TCR TB9: CASSPDRREQFF  
TCR TB10: CASSRDRNYEQYKF

**Rhijn, et al, 2013 [30] (Tuberculosis TCR) 3 patients**

TCR TB N5: CASSQPIGGGEQFF  
TCR TB C52: CASRPPLTARGLKHTGELFF  
TCR TB A22: CAWAKTGFGGDTQYF  
TCR TB C58: CASSPRLAGDEQFF

**Luo, et al, 2012 [28] (Tuberculosis TCR) 1 patient**

TCR Tb 5: CASSGGGSNKLIYF  
TCR Tb 16: CASSGGGSNKLIEQYF  
TCR Tb 18: CASSGGGNKLIQFF  
TCR Tb 31: CASSGGGANKLITQYF  
TCR Tb 36: CASSGGGAKLIF  
TCR Tb 40: CASSGGDNKLIQYF  
TCR Tb 45: CASSASGTNKHIF  
TCR Tb 49: CASRDDGTNKLINQYF  
TCR Tb 51: CASSEGCTTNKLIF  
TCR Tb 55: CASSEASTNKFINEQFF  
TCR Tb 67: CASSGAASTNKLTEQFF  
TCR Tb 71: CASSGGSADKLIF  
TCR Tb 79: CASSETSADKLIF

TCR Tb 81: CASSETSNDKLNNEQFF  
TCR Tb 84: CASSEITSGNKFIQYF

**Levitsky, et al, 1998 [26] (Epstein-Barr Virus TCR) 1 patient**

TCR EBV1: CASSLYGRGQPQ  
TCR EBV2: CASSFGSGSSYGY  
TCR EBV3: CASSVAESPGYPPLVTEA

**Silins, et al., 1997 [27] (Epstein-Barr Virus TCR) 3 patients**

TCR EBV H57: CASSLISGNTGELFFG  
TCR EBV H41: CASSPLTGEETQYFG  
TCR EBV H39: CASSRLGQGSSELFFG  
TCR EBV H38: CASSVNREGTVTGELFFG  
TCR EBV LC5: CASSPGQGTGYGYTFG  
TCR EBV LC34: CSVEGAGEGGEQYFG  
TCR EBV LC50: CASSLRFSGGQLNEKLFFG  
TCR EBV BT66: CASNRLTGLDDEQFFG  
TCR EBV BT67: CASSSGLSTDTQYFG  
TCR EBV BT73: CASAPSGRNPYEQYFG  
TCR EBV BT74: CASSLILVGFSEQFFG  
TCR EBV BT142: CASSQGRDFEGRFGYTFG

**Utz, et al., 1996 [24] (HTLV-1 TCR) 1 patient**

TCR HTLV-1 1-1: CASSIWGYNEQ  
TCR HTLV-1 1-2: CASSISPTQTAQNEQ  
TCR HTLV-1 1-3: CATSRITSGEPYEQ  
TCR HTLV-1 1-4: CASSLGVPEQ  
TCR HTLV-1 2-1: CASSQDPSGMIYEQ  
TCR HTLV-1 2-2: CASSYPGGGFYEQ  
TCR HTLV-1 3-1: CASSYPGQGVNEQ  
TCR HTLV-1 3-2: CASRPGLAGGRPEQ  
TCR HTLV-1 3-3: CASSFLGGGQETQ  
TCR HTLV-1 3-4: CSETGLEGYTF  
TCR HTLV-1 3-5: CASSKGGLNSPL

**Bourcier, et al., 2001 [25] (HTLV-1 TCR) 1 patient**

TCR HTLV-1 1: CASSQERLSFGTKNIQ ?  
TCR HTLV-1 2: CASSEYRSGANVLT  
TCR HTLV-1 3: CASSKPSVMNTEA  
TCR HTLV-1 4: CASSSPGQGNYEQ  
TCR HTLV-1 5: CASSTPGQGAYEQ

TCR HTLV-1 6: CASSYPGQGEHEQ  
TCR HTLV-1 7: CASSPGTGVNEQ  
TCR HTLV-1 8: CASSKPGLGGTGEL  
TCR HTLV-1 9: CASSRPGLAGRNEQ  
TCR HTLV-1 10: CASQLGQGVHGYGY  
TCR HTLV-1 11: CASQDFLSSGAYNEQ  
TCR HTLV-1 12: CASSLTIGGAQ  
TCR HTLV-1 13: CASSFMTDTQ  
TCR HTLV-1 14: CASSLPDTQ  
TCR HTLV-1 15: CASSARLGQPQ

### **ANTISENSE CONTROL TCR LIST**

TRSRPAVPAMLVM  
TRSRKWPALVLVK  
TRSRFSCGNRSF  
TRSLCGYWPWRSFEC  
TRSREPLWLYEF  
TRRSRPWPKVGVVK  
TRRSVAVFWPLEMI  
TRSRKRGPEPPARNLLVIM  
TRRSALRERNLYEIM  
TRSLVPRERPLEIM  
TRSREPWPLCLWVKI  
TRSREPPVQKLVKI  
TRQRLPPRKLYQFIPGP  
TRNRLWRKLYENI  
TRSRGPWSPWCKLVKI  
TRSRENRVVGVLIPLP  
TRSRENSLLGLVIPLP  
TRSREHAWKLLKIPGP  
TRRSWAELYEIMPGP  
TRSRLLAHPLWLKIP  
TRSRLLPHPLYEGIP  
TRSRLLWHPLYEIMP  
TRSRLLWPLCWLKIP  
TRSRLLHELWLYIP  
TRSRGLFHLWLKGP  
TRSRHSRPLWCKGP  
TRSRSLGRVWLKGP  
TRSRFASRLLKM  
TRSRWLCLRIMPLP

TRSRSHGLLLRIMPLP  
TRSRWVKELLIMP  
TRSRFARLLWLKIPGP  
TRSRFARSKLLKMPGP  
TRSRFARWPLEIMPLP  
TRSRFASWLCLKIPGP  
TRSRREERRLLKIPGP  
TRSRRPGPHEWLIM  
TRSRPGLRGEVI  
TRSRGLASLLIM  
TRSRALSLKLLKYI  
TRSR LGFPPPLIM  
TRSRAGGEWRAPEYVWPLEIM  
TRTRYWPIPLCLKM  
TRSRGAERPLLLIM  
TRTRGWSEAERSCLWLKI  
TRSRPPPSLYEFKI  
TRSR LPPSLYEF LIM  
TRSRPPPSLYEFLLKI  
TRSRPPPLYEFLLIM  
TRSRPPRLYEFWLKI  
TRSRPPPRYEFI  
TRSRP LLYEF LKI  
TRSR RSPWLYVFI  
TRSRLLPWYEFKILLIM  
TRSR LPTWCLYEFI  
TRSR LRSWLYIFILLMI  
TRSRPRRSWIYECLLIM  
TRSRPPSRLYEFI  
TRSR LWSRLYIFMI  
TRSR LWSLLYEFLLIIM  
TRSR LFWSPLYIFLKI  
TRSRREKPAPIGI  
TRSRIPSPRSKPK  
TRSRHRLSGPKGGEHWLR  
TRSR LSRPPKLLI  
TRSRREFSPLWPLEIMP  
TRSRREEPEILLIMIP  
TRSRGEWPLLCIKIP  
TRSR AEPIPSPLEIMP  
TRSRHLALPWHCPLEIMP  
TRSRGPIPWP KPCIP  
TRHLPRPLPLIKIP  
TRSR AEISPPIELLYEIMP



TRSLAEWPELLLIIMP  
TRRSRPERWLCIKIP  
TRSRGSPAEGKLIKIP  
TRSREQEHPISLIIMP  
TRSRHPALILPSIPKWIP  
TRSRFTPKLLI  
TRSRFSGWICRILLI

TRWRSFCRPLGLI  
TRSREPHGLI  
TRSRILGSPFFKLI  
TRSRKGPPPIKLI  
TRSRKGPIPHLLI  
TRSAGPERPPSGLI  
TRSRIEPPPILWI  
TRLWPELPCICI  
TRSRYPPELSGI  
TRSRILAESIPWYLFII  
TRSRSLKASPRLHEW  
TRSRYGSHFLWLR  
TRSRSGPIPLKLI  
TRSRWGPIPRKLI  
TRSRKGPIPLVLI  
TRSRSGPWPHELLI  
TRSRYGPEPPWPLE  
TRSRAGPERPSLLI  
TRSIEIPHVPKPK  
TRSILIERPRKLLI  
TRSREWFPPRI  
TRSRIFWLCI  
TRSRERGEWI  
TRSRRAEPIGI

#### **CROHN'S DISEASE TCR LIST (6 patients) 103 TcR**

##### **Gulwani-Akolkor, 1996 [32] (3 patients)**

###### **Patient C**

CASKQLRNSPLHFGNG  
CASSLTGLGANYGYFGSG  
CASSEPQGGSPHLHFGNG

CATSDPHRDPSGEQFFGPG  
CATSDFTSGSQETQYFGPG

**Patient E**

CASSKRDRMKTQYGPG  
CASRKIGGRHYGYFGSG  
CASSQDPGRMEKLFFGSG  
CASSQAIGDTGNTIYFGEG  
CASSPQRRGYQETQYFGPG  
CASSRTVSYGYTFGSG  
CASSQVSSNNEQFFGPG  
CASSQMSGTGEQFFGPG  
CASSRQYEQFFGPG  
CASRQNPHSGELFFGEG  
CASSRRLAGTDTQYFGPG  
CASRQHFGQGHSYEQYFGPG  
CASSPELEGAPLHFGNG  
CASSLNGQAAGQPQHFGDG

**Patient G**

CSARGDSNQPQHFGDG  
CSARNPRAGGTDQYFGPG  
CASRKIGGRHYGYTFGSG  
CSARDASGTVYNEQFFGPG  
CSALFRTGPGQPQHFGDG  
CSANTGPAQPQHFGDG  
CSARCDTQYFGPG  
CSARDAGGAKDTQYFGPG  
CSASRLAGGFYNEQFFGPG  
CSARAGPGYEQYFGPG  
CSATLPQETQYFGPG  
CSGGVQETQYFGPG  
CSARTAGGNTIYFGEG  
CSASPTGRGNTIYFGEG

**Probert, et al., 1998 [33] (3 patients)**

**Twin D**

CASSRSRVATDTQYFG  
CASSPDSTRQPQHFG  
CASSQDPTSPTATDTQYFG  
CASSTENRGPPQHFG  
CASSNHTTGMNEKLFFG  
CASSPRGGASYNEQFFGQG

CASSPRGEAYNEQFFGQG  
CASSRGGGSYNEQFFGQG  
CASSGGGSYNEQFFGQG  
CASRLNTGYNFGS  
CASRAFSGGNGDYTEAF  
CASRLDRVGEKLFFGS  
CASSFVRGSNQPQHFGD

**Twin H**

CASSVQGDTEAFFG  
CASSDGKLASYEQYFG  
CASSRGGGSYNEQFFGQG  
CASSTENRGPQPQHFG

**Patient Table II.**

CASSTRQGETEAFFG  
CASSLGQSQFFG  
CASSKTGYLNSTEAFFG  
CASSLGRGYYGYTFG  
CASSGPGTKSYGYTFG  
CASSRRTGSPLHFG  
CASSPGQPTGELFFG  
CASSGTGHTDTQYFG  
CASSKRTDTQYFG  
CASSRPGTDTQYFG  
CASSNPDSFLTESYEQYFG  
CASSESGAYGYTFG  
CASSAGMVATEAFFG  
CASSGGIGAWRTEAFFG  
CASSTGGGQPQHFG  
CASSQGGSPRQPQHFG  
CASSDPPGADLSQFFG  
CASSGHSTGELFFG  
CASSGTGTGELFFG  
CASSEATDTQYFG  
CASSELAATDTQYFG  
CASSRAKATDTQYFG  
CASSVGAATDTQYFG  
CASSVGTDTKTDTQYFG  
CASSQGGETQYFG  
CATSRVGGIVTEAFFG  
CATSISGDSGSYGYTFG  
CATSRPTGLQPQHFG  
CATSINSYTDQYFG

CATSDIPDGTEAFFG  
CATSRTRDPTEAFFG  
CATSMAGRTSYEQYFG  
CATSKTSGVSYEQYFG

## **DIABETES TCR LIST (8 patients) 68 TcR**

### **Naserke et al., 1996 [37] (1 patient)**

TCR DIA 1: CASSLWGSNQPQH  
TCR DIA 2: CASSDRLGNQPQH  
TCR DIA 3: CASSHSGVNGNQPQH

### **Conrad, et al. 1994 [36] (2 patients)**

TCR DIA 1.1: CASSQGITASY  
TCR DIA 1.2: CASSQDKSGEVGE  
TCR DIA 1.3: CASSQVHGQ  
TCR DIA 1.4: CASSQVSRYS  
TCR DIA 1.5: CASSQVSGN  
TCR DIA 1.6: CASSQVHGN  
TCR DIA 1.7: CASSQVAGAGT  
TCR DIA 1.8: CASSQEGSGGPT  
TCR DIA 1.9: CASSQVAGGPT  
TCR DIA 1.10: CASSQDASGSQT  
TCR DIA 1.11: CASSQDGGLY  
TCR DIA 1.12: CASSPTDGY  
TCR DIA 1.13: CASSQRRGLADE  
TCR DIA 2.1: CASSQTGAWWA  
TCR DIA 2.2: CASSVQPRQGC  
TCR DIA 2.3: CASSQDSGNKE  
TCR DIA 2.4: CASSSTGTAN  
TCR DIA 2.5: CASSAMGEGAN  
TCR DIA 2.6: CASSLGDTL  
TCR DIA 2.7: CASSLHTTSRV  
TCR DIA 2.8: CASSQILGND  
TCR DIA 2.9: CASSQASGN  
TCR DIA 2.10: CASSPGLAGPQGTY  
TCR DIA 2.11: CASSQGSPSFHN  
TCR DIA 2.12: CASSQFGQGPPPAEF  
TCR DIA 2.13: CASSATCAHST  
TCR DIA 2.14: CASSQGAGVSSLA

TCR DIA 2.15: CASSQSGSFH  
TCR DIA 2.16: CASSQDLGSSQR  
TCR DIA 2.17: CASSGQAGTG  
TCR DIA 2.18: CASSRRSPAGGARE  
TCR DIA 2.19: CASSQSPKGT  
TCR DIA 2.20: CASSQDKGAA  
TCR DIA 2.21: CASSPGHAGLVT  
TCR DIA 2.22: CASSQFPAGGLGD  
TCR DIA 2.23: CASSHKPGGQGT  
TCR DIA 2.24: CASSQGFREGI  
TCR DIA 2.25: CASSQEQAGGMY  
TCR DIA 2.26: CASSQDLRGSTSY  
TCR DIA 2.27: CASSQGSAGSY  
TCR DIA 2.28: CASSQAGTGLG

**Berardinis, et al. 1994 [35] (1 patient)**

TCR DIA B1: CASSMEETQYF  
TCR DIA B2: CASSFRDRGQETQYF  
TCR DIA B3: CASSLDREETQYF  
TCR DIA B4: CASSLESGARDTQYF  
TCR DIA B5: CASSLFLGLAGVGEQFF  
TCR DIA B6: CASYRTRSYEQYF  
TCR DIA B7: CASGDRGWNEQFF

**Kent, et al., 2005 [38] (3 patients)**

Patient 1

TCR diabetic 1 CSVEATRADTQYFGPG  
TCR diabetic 2 CASSLAVIRTDQYFGPG  
TCR diabetic 3 CAVGALAGTASKLTGTG

Patient 2

TCR diabetic 4 CASSLATSOGGSDTQYFGPG  
TCR diabetic 5 CAVVNMDSNYQLIWGAG  
TCR diabetic 6 CADAGGTSYKLFQGG  
TCR diabetic 7 CIPGSEYGNKLVFGAG

Patient 3

TCR diabetic 8 CASSQVRLAGGGEQFFGPG  
TCR diabetic 9 CASSLGQGETEAFFGQG  
TCR diabetic 10 CASRNLGLNTEAFFGQG  
TCR diabetic 11 CASSFRRBTDQYFGPG

**Codina-Busqueta, et al., 2011 [39] (1 patient)**

TCR DIA K2.4: CASSQEADIQYF  
TCR Diabetic K2.12: CASSDRLGNQPQHF  
TCR Diabetic K2.16: CASSQDRLRGVADTQYF
